# Supplementary material
Source: publisher figshare collection journal article supplement (https://tandf.figshare.com/ndownloader/files/15264674)
Supplement: Supplementary file 1 [file 15264674]

---
title: "code_review"
date: "1/14/2019"
output: html_document
---

```{r setup, include=FALSE}
knitr::opts_chunk$set(echo = TRUE)
```

## Imputation of mixed data

```{r libraries}
library(softImpute)
library(mimi)
library(missMDA)
library(jomo)
library(mice)
library(denoiseR)
library(h2o)
h2o.init(nthreads=-1,max_mem_size = "2G")

```

## functions for cross-validation and simulations

```{r cross-validation-simu-functions}

# Function that does cross-validation for softImpute
cv.sft <- function(y,
                   N = 10,
                   thresh = 1e-5,
                   maxit = 100,
                   parallel = T,
                   len = 20,
                   trace.it=T) {
  y <- as.matrix(y)
  Y2 <- y
  Y2[is.na(Y2)] <- 0
  d <- dim(y)
  n <- d[1]
  p <- d[2]
  m <- sum(!is.na(y))
  na_func <- function(x, prob = 0.1) {
    x <- as.matrix(x)
    omega <- !is.na(x)
    obs.idx <- which(omega)
    yp <- x
    yp[sample(obs.idx, round(prob * sum(omega)))] <- NA
    return(yp)
  }
  lambda1.max <- max(svd(Y2)$d)
  lambda1.min <- 1e-3*lambda1.max
  grid.lambda1 <-
    exp(seq(log(lambda1.min), log(lambda1.max), length.out = len))
  if (parallel) {
    nbco <- detectCores()
    cl <- makeCluster(nbco)
    registerDoParallel(cl)
    res.cv <-
      foreach(k = 1:N,
              .packages = c("softImpute", "parallel")) %dopar% {
                sapply(1:len,
                       function(i) {
                         yy <- na_func(as.matrix(y), prob = 0.1)
                         if (trace.it)
                           print(paste("lambda", i))
                         res <-
                           softImpute(as.matrix(yy),
                                      lambda = grid.lambda1[i],
                                      rank.max = min(n,p)-1)
                         u <- res$u
                         d <- res$d
                         v <- res$v
                         if (is.null(dim(u))) {
                           res <- d * u %*% t(v)
                         } else {
                           res <- u %*% diag(d) %*% t(v)
                         }
                         imp <- as.matrix(yy)
                         imp[is.na(yy)] <- res[is.na(yy)]
                         return(sqrt(sum((res - y) ^ 2, na.rm = T)))
                       })
              }
  } else{
    ylist <-
      lapply(1:N, function(k)
        na_func(as.matrix(y), prob = 0.1))
    res.cv <-   lapply(1:N, function(k) {
      if (trace.it)
        print(paste("boot", k))
      sapply(1:len,
             function(i) {
               yy <- na_func(as.matrix(y), prob = 0.1)
               if (trace.it)
                 print(paste("lambda", i))
               res <-
                 softImpute(as.matrix(yy),
                            lambda = grid.lambda1[i],
                            rank.max = min(n,p)-1)
               u <- res$u
               d <- res$d
               v <- res$v
               if (is.null(dim(u))) {
                 res <- d * u %*% t(v)
               } else {
                 res <- u %*% diag(d) %*% t(v)
               }
               imp <- as.matrix(yy)
               imp[is.na(yy)] <- res[is.na(yy)]
               return(sqrt(sum((res - y) ^ 2, na.rm = T)))
             })

    })
  }
  res.cv <- colMeans(do.call(rbind, res.cv))
  l <- which.min(res.cv)
  lambda <- grid.lambda1[l]
  dat <-
    data.frame(errors = res.cv,
               lambda1 = grid.lambda1)


  return(list(
    lambda = lambda,
    errors = dat
  ))
}

# Function that does cross-validation for all 7 methods simultaneously
cv <- function(n=150,p=30,K=2,prob=0.2,sig=1){
  gr <- sapply(1:5, function(i) sample(1:n, round(n/5)))
  cov <- 1*sapply(1:5, function(i) rep(sapply(1:n, function(j) j%in%gr[,i]),p))
  alpha <- c(1.2,0,1.2,0,0)
  theta <- LRsim(n,p,K,10)$X
  theta <- norm(matrix(cov%*%alpha, nrow=n))/(sig*norm(theta, type="F"))*theta
  x0 <- matrix(cov%*%alpha, nrow=n) + theta
  x0 <- x0*50/norm(x0, type="F")
  x1 <- cbind(matrix(rnorm(mean = c(x0[, 1:15]), sd = 0.5, n * p/2), nrow = n),
              matrix(rbinom(n * p/2, prob = c(exp(x0[, 16:30])/(1+exp(x0[, 16:30]))), size = 1), nrow = n))

  idx_NA <- sample(1:(n * p), size = round(0.1 * n * p))
  x <- x1
  x[idx_NA] <- NA
  xfamd <- data.frame(x)
  for(j in 16:30){
    xfamd[,j] <- as.factor(xfamd[,j])
  }
  
  write.table(x, file="~/Desktop/multiple_effects_glrm/code/table.txt")
  ## Imputation
  cv_mimi <- cv.mimi(x, model = "covariates", x=cov, var.type = c(rep("gaussian", 15), rep("binary", 15)), len=10)
  lambda1_mimi <- cv_mimi$lambda[1]
  lambda2_mimi <- cv_mimi$lambda[2]
  gait.hex <- h2o.importFile(path = normalizePath("~/Desktop/multiple_effects_glrm/code/table.txt"), destination_frame = "gait.hex")
  gait.tr <- gait.hex[1:75,2:ncol(gait.hex)]
  gait.val <- gait.hex[76:150,2:ncol(gait.hex)]
  err_glrm <- rep(0,10)
  for(k in 1:10){
    gait.glrm <- h2o.glrm(training_frame = gait.tr, k = k, loss_by_col = c(rep("Quadratic", 15), rep("Logistic", 15)), regularization_x = "L2", regularization_y = "L2", max_iterations = 1000, gamma_x=10, gamma_y=10, validation_frame=gait.val)
    err_glrm[k] <- gait.glrm@model$validation_metrics@metrics$numerr
  }
  k_glrm <- which.min(err_glrm)
  lambda_soft <- cv.sft(x, parallel=F)$lambda
  ncp_famd <- estim_ncpFAMD(xfamd)$ncp
  return(list(lambda1_mimi=lambda1_mimi, lambda2_mimi=lambda2_mimi, k_glrm=k_glrm, lambda_soft=lambda_soft, ncp_famd=ncp_famd))
}

simu <- function(lambda1_mimi, lambda2_mimi, k_glrm, lambda_soft, ncp_famd,n=150,p=30,K=2,prob=0.3,sig=1){
  n <- 150
  p <- 30
  gr <- sapply(1:5, function(i) sample(1:n, round(n/5)))
  cov <- 1*sapply(1:5, function(i) rep(sapply(1:n, function(j) j%in%gr[,i]),p))
  alpha <- c(1.2,0,-1.2,0,1)
  theta <- LRsim(n,p,K,10)$X
  theta <- norm(matrix(cov%*%alpha, nrow=n))/(sig*norm(theta, type="F"))*theta
  x0 <- matrix(cov%*%alpha, nrow=n) + theta
  x0 <- x0*50/norm(x0, type="F")
  x1 <- cbind(matrix(rnorm(mean = c(x0[, 1:15]), sd = 0.5, n * p/2), nrow = n),
              matrix(rbinom(n * p/2, prob = c(exp(x0[, 16:30])/(1+exp(x0[, 16:30]))), size = 1), nrow = n))

  idx_NA <- sample(1:(n * p), size = round(prob * n * p))
  x <- x1
  x[idx_NA] <- NA
  xfamd <- data.frame(x)
  timing <- rep(0,7)
  for(j in 16:30){
    xfamd[,j] <- as.factor(xfamd[,j])
  }
  
  write.table(x, file="~/Desktop/multiple_effects_glrm/code/table.txt")
  
  ## Imputation
  t <- Sys.time()
  impute_mimi <- mimi(y=x, model = "covariates", x=cov, var.type = c(rep("gaussian", 15), rep("binary", 15)), lambda1=lambda1_mimi, lambda2=lambda2_mimi)
  timing[1] <- Sys.time()-t
  t <- Sys.time()
  gait.hex <- h2o.importFile(path = normalizePath("~/Desktop/multiple_effects_glrm/code/table.txt"), destination_frame = "gait.hex")
  gait.hex <- gait.hex[,2:ncol(gait.hex)]
  gait.glrm <- h2o.glrm(training_frame = gait.hex, k = k_glrm, loss_by_col = c(rep("Quadratic", 15), rep("Logistic", 15)), regularization_x = "L2", regularization_y = "L2", max_iterations = 1000)
  impute_glrm <- predict(gait.glrm, gait.hex)
  timing[2] <- Sys.time()-t
  t <- Sys.time()
  impute_soft <- softImpute(x, lambda = lambda_soft, rank.max = min(n,p)-1)
  impute_soft <- impute_soft$u%*%diag(impute_soft$d)%*%t(impute_soft$v)
  timing[3] <- Sys.time()-t
  t <- Sys.time()
  impute_famd <- imputeFAMD(xfamd, ncp=ncp_famd)$completeObs
  for(j in 16:30){
    impute_famd[,j] <- gsub(".*_", "", impute_famd[,j])
  }
  impute_famd <- matrix(as.numeric(as.matrix(impute_famd)), nrow=n)
  timing[4] <- Sys.time()-t
  t <- Sys.time()
  col_mean_rep <- matrix(rep(colMeans(x, na.rm=T), n), nrow=n)
  impute_mean <- x
  impute_mean[is.na(x)] <- col_mean_rep[is.na(x)]
  timing[5] <- Sys.time()-t
  group <- rep(1,n)
  for(i in 1:ncol(gr)){
    group[gr[,i]] <- i+1
  }
  group <- as.factor(group)
  t <- Sys.time()
  xmice <- cbind.data.frame(group,xfamd)
  xmice <- within(xmice,{
  countryID <- as.numeric(group)
})
  imp0 <- mice(xmice, maxit=0)
  pred1 <- imp0$predictorMatrix
  pred1[,"group"] <- 0  
  pred1[,"countryID"] <- -2  
  impute_mice <- mice(xmice, m=1)
  impute_mice <- complete(impute_mice)
  impute_mice <- matrix(as.numeric(as.matrix(impute_mice)),nrow=n)
  timing[6] <- Sys.time()-t
  t <- Sys.time()
  impute_multilevel <- imputeMultilevel(cbind.data.frame(group,xfamd), ifac=1)$completeObs[, 2:(p+1)]
  impute_multilevel <- matrix(as.numeric(as.matrix(impute_multilevel)),nrow=n)
  timing[7] <- Sys.time()-t
  errors_num <- c(norm(impute_mimi$y.imputed[,1:15]-x1[,1:15], type="F"), norm((as.matrix(impute_glrm)[,1:15]-x1[,1:15])*is.na(x[,1:15]), type="F"), norm(impute_soft[,1:15]-x1[,1:15], type="F"), norm(impute_famd[,1:15]-x1[,1:15], type="F"), norm(impute_mean[,1:15]-x1[,1:15], type="F"), norm(impute_multilevel[,1:15]-x1[,1:15], type="F"), norm(impute_mice[,1:15]-x1[,1:15], type="F"))
  errors_bin <- c(norm(impute_mimi$y.imputed[,16:30]-x1[,16:30], type="F"), norm((as.matrix(impute_glrm)[,16:30]-x1[,16:30])*is.na(x[,16:30]), type="F"), norm(impute_soft[,16:30]-x1[,16:30], type="F"), norm(impute_famd[,16:30]-x1[,16:30], type="F"), norm(impute_mean[,16:30]-x1[,16:30], type="F"), norm(impute_multilevel[,16:30]-x1[,16:30], type="F"), norm(impute_mice[,16:30]-x1[,16:30], type="F"))
  return(list(errors_num=errors_num, errors_bin=errors_bin, timing=timing))
}

```


# Section 5.1 - Estimation of main effects and interactions

```{r}
# Function which simulates a data set with predefined parameters and estimates alpha and theta with the two compared methods
library(mvtnorm)
simu_estim <- function(lambda1_mimi, lambda2_mimi, lambda_soft, n=150,p=30,K=2,s=3,prob=0.3,sig=1,N=20){
  
  # Synthetize data set
  cov <- rmvnorm(n*p, mean=rep(0, N))
  alpha <- rep(0,N)
  alpha[sample(1:N,s)] <- 2
  theta <- LRsim(n,p,K,10)$X
  theta <- norm(matrix(cov%*%alpha, nrow=n))/(sig*norm(theta, type="F"))*theta
  x0 <- matrix(cov%*%alpha, nrow=n) + theta
  alpha <- alpha*50/norm(x0, type="F")
  theta <- theta*50/norm(x0, type="F")
  x0 <- x0*50/norm(x0, type="F")
  x1 <- matrix(rnorm(mean = c(x0), sd = 0.5, n * p), nrow = n)
  # Add missing values
  idx_NA <- sample(1:(n * p), size = round(prob * n * p))
  x <- x1
  x[idx_NA] <- NA

  # Imputation
  ## mimi
  impute_mimi <- mimi(y=x, model = "covariates", x=cov, var.type = rep("gaussian", p), lambda1=lambda1_mimi, lambda2=lambda2_mimi)
  alpha_mimi <- impute_mimi$alpha
  theta_mimi <- impute_mimi$theta
  
  ## two-step group means+SVD
  alpha_soft <- solve(t(cov[!is.na(x),])%*%cov[!is.na(x),])%*%t(cov[!is.na(x),])%*%c(x[!is.na(x)])
  x2 <- x-matrix(cov%*%alpha_soft, nrow=n)
  impute_soft <- softImpute(x2, lambda = lambda_soft, rank.max = min(n,p)-1)
  theta_soft <- impute_soft$u%*%diag(impute_soft$d)%*%t(impute_soft$v)
  
  # Compute estimation errors
  errors_alpha <- c(norm(alpha_mimi-alpha, type="2"), norm(alpha_soft-alpha, type="2"))
  errors_theta <- c(norm(theta_mimi-theta, type="F"), norm(theta_soft-theta, type="F"))
  return(list(errors_alpha=errors_alpha, errors_theta=errors_theta))
}

# Function that performs cross-validation to select the mimi and softImpute parameters
cv_estim <- function(n=150,p=30,K=2,s=3,N=20,prob=0.3,sig=1){
  cov <- rmvnorm(n*p, mean=rep(0, N))
  alpha <- rep(0,N)
  alpha[sample(1:N,s)] <- 2
  theta <- LRsim(n,p,K,10)$X
  theta <- norm(matrix(cov%*%alpha, nrow=n))/(sig*norm(theta, type="F"))*theta
  x0 <- matrix(cov%*%alpha, nrow=n) + theta
  alpha <- alpha*50/norm(x0, type="F")
  theta <- theta*50/norm(x0, type="F")
  x0 <- x0*50/norm(x0, type="F")
  x1 <- matrix(rnorm(mean = c(x0), sd = 0.5, n * p), nrow = n)
  idx_NA <- sample(1:(n * p), size = round(prob * n * p))
  x <- x1
  x[idx_NA] <- NA
  
  ## mimi
  cv_mimi <- cv.mimi(y=x, model = "covariates", x=cov, var.type = rep("gaussian", p),len=10)
  cv_soft <- cv.sft(x, parallel=F)
  return(list(lambda1_mimi=cv_mimi$lambda[1], lambda2_mimi=cv_mimi$lambda[2],
              lambda_soft = cv_soft$lambda))
}
```


```{r}

# Set parameters of simulation
n <- 150 #nb of rows
p <- 150 #nb of cols
K <- 2 #rank
s <- 2 #sparsity
N <- 20 #size of dictionary
sig <- 1 #ratio main effects/interactions
prob <- 0.2 #proportion of missing values
nbsim <- 100 #number of times to repeat simulation

# Do cross-validation for all methods
cv_result <- cv_estim(n=n,p=p,s=s,K=K,N=N,sig=sig)

# Do simulation with cv parameters nbsim times
simu_result <- lapply(1:nbsim, function(i) simu_estim(lambda1_mimi=cv_result$lambda1_mimi,lambda2_mimi=cv_result$lambda2_mimi, lambda_soft=cv_result[[3]], n=n,p=p,s=s,K=K,N=N,sig=sig,prob=prob))

# Compute estimation errors
errors_alpha <- do.call(rbind, lapply(simu_result, function(t) t$errors_alpha))
errors_theta <- do.call(rbind, lapply(simu_result, function(t) t$errors_theta))

# Average estimation errors
colMeans(errors_alpha)
colMeans(errors_theta)
```


## Section 5.2 - Imputation of mixed data


```{r}
# Set parameters of simulation
nbsim <- 100
prob <- 0.2
sig <- 1

# Do cross-validation for all methods
cv_result <- cv(sig=sig)

# Simulation with cv parameters repeated nbsim times
simu_result <- lapply(1:nbsim, function(i) simu(lambda1_mimi=cv_result$lambda1_mimi, lambda2_mimi=cv_result$lambda2_mimi, k_glrm=cv_result$k_glrm, lambda_soft=cv_result$lambda_soft, ncp_famd=cv_result$ncp_famd, prob=prob, sig=sig))

# Compute imputation errors by variable types and for all variables
errors_numeric <- do.call(rbind, lapply(simu_result, function(t) t$errors_num))
errors_binary <- do.call(rbind, lapply(simu_result, function(t) t$errors_bin))
colnames(errors_numeric) <- c("mimi", "GLRM", "softImpute", "FAMD", "mean", "MLFAMD", "mice")
colnames(errors_binary) <- c("mimi", "GLRM", "softImpute", "FAMD", "mean", "MLFAMD", "mice")
errors_all <- sqrt(errors_numeric^2+errors_binary^2)
colnames(errors_all) <- c("mimi", "GLRM", "softImpute", "FAMD", "mean", "MLFAMD", "mice")

colMeans(errors_all)
sapply(1:7, function(i) sd(errors_all[,i]))
colMeans(errors_numeric)
sapply(1:7, function(i) sd(errors_num[,i]))
colMeans(errors_binary)
sapply(1:7, function(i) sd(errors_bin[,i]))

# Compute the average computational times of all methods
timing <- do.call(rbind, lapply(simu_result, function(t) t$timing))
colMeans(timing)
sapply(1:7, function(i) sd(timing[,i]))


## Do boxplots of imputation errors for numeric, binary variables, and for all variables

boxplot(errors_numeric, ylim=c(min(errors_numeric), max(errors_numeric)), outline=FALSE)

boxplot(errors_binary, ylim=c(min(errors_binary), max(errors_binary)), outline=FALSE)

boxplot(errors_all, outline=FALSE)

```
